# Supplementary material
Source: publisher figshare collection journal article supplement (https://sage.figshare.com/ndownloader/files/17985740)
Supplement: Supplementary file 1 [file 17985740]

**Appendix 1. Sample size**

| Year    | MEPS Data |                 | Those who worked during at least one of the rounds in each year* |                 |
|---------|-----------|-----------------|------------------------------------------------------------------|-----------------|
|         | Sample    | Weighted sample | Sample                                                           | Weighted sample |
| 2007    | 30,964    | 301,309,149     | 15,241                                                           | 165,772,418     |
| 2008    | 33,066    | 304,375,942     | 16,419                                                           | 165,784,555     |
| 2009    | 36,855    | 306,660,588     | 17,761                                                           | 163,066,879     |
| 2010    | 32,846    | 308,573,976     | 15,651                                                           | 161,796,275     |
| 2011    | 35,313    | 311,125,758     | 16,769                                                           | 163,513,977     |
| 2012    | 38,974    | 313,489,853     | 18,573                                                           | 163,513,835     |
| 2013    | 36,940    | 315,721,982     | 17,844                                                           | 167,413,482     |
| 2014    | 34,875    | 318,440,423     | 17,097                                                           | 172,229,963     |
| 2015    | 35,427    | 321,423,251     | 17,527                                                           | 173,368,737     |
| 2016    | 34,655    | 323,141,687     | 17,127                                                           | 175,428,192     |
| Average |           | 312,426,261     |                                                                  | 167,188,831     |

\* Respondents with military occupations were excluded.

**Appendix 2.** Weighted prevalence for sociodemographic, economic, and work-related characteristics, U.S. working population (MEPS, 2007–2016)\*

| Characteristic                      | Percentage [95% CI] |
|-------------------------------------|---------------------|
| Male                                | 52.1 [51.8–52.4]    |
| Age category                        |                     |
| 16–24                               | 14.1 [13.9–14.3]    |
| 25–44                               | 42.5 [42.2–42.8]    |
| 45–64                               | 37.7 [37.4–38.0]    |
| 65+                                 | 5.7 [5.6–5.9]       |
| Race or ethnicity                   |                     |
| Hispanic                            | 15.3 [15.2–15.5]    |
| Non-Hispanic white                  | 65.8 [65.6–66.1]    |
| Non-Hispanic black                  | 11.3 [11.1–11.4]    |
| Non-Hispanic other                  | 7.6 [7.4–7.7]       |
| Marital status                      |                     |
| Married                             | 53.9 [53.6–54.2]    |
| Divorced, separated, or widowed     | 15.4 [15.1–15.6]    |
| Never married                       | 30.8 [30.5–31.1]    |
| College education                   | 60.4 [60.1–60.7]    |
| Health Insurance                    |                     |
| Any private                         | 77.0 [76.9–77.3]    |
| Public                              | 8.3 [8.2–8.5]       |
| Uninsured                           | 14.6 [14.4–14.8]    |
| Family income as % of poverty line  |                     |
| Poor                                | 7.6 [7.5–7.8]       |
| Near poor or low income             | 14.7 [14.5–14.9]    |
| Middle or high income               | 77.8 [77.5–78.0]    |
| Self-employed                       | 11.0 [10.8–11.3]    |
| Number of employees at the main job |                     |
| < 10                                | 27.2 [26.9–27.5]    |
| 10–99                               | 39.4 [39.1–39.7]    |
| > 100                               | 33.4 [33.1–33.7]    |
| Average hours worked per week       |                     |
| < 35                                | 26.0 [25.8–26.3]    |
| 35–40                               | 48.9 [48.6–49.2]    |
| > 40                                | 25.0 [24.7–25.3]    |
| Member of a union                   | 10.0 [9.9–10.2]     |
| Occupation                          |                     |
| Management and finance              | 15.1 [14.9–15.4]    |
| Professional and related            | 22.8 [22.5–23.1]    |
| Service                             | 17.7 [17.5–17.9]    |
| Sales and related                   | 10.0 [9.8–10.2]     |
| Office and administrative support   | 12.3 [12.1–12.6]    |
| Farming, fishing, and forestry      | 0.7 [0.7–0.8]       |
| Construction and extraction         | 8.1 [8.0–8.3]       |
| Production and transportation       | 12.1 [11.9–12.3]    |
| Unclassifiable                      | 1.2 [1.1–1.2]       |
| Census region                       |                     |
| Northeast                           | 18.0 [17.8–18.3]    |
| Midwest                             | 22.3 [22.0–22.5]    |

| Characteristic | Percentage [95% CI] |
|----------------|---------------------|
| South          | 36.3 [36.0–36.6]    |
| West           | 23.3 [23.1–23.6]    |

\* Unweighted n = 170,009; weighted n = 167,188,831.

<sup>1</sup> Respondents aged 16 or older who worked at least in one of the three rounds within a year. Respondents with military occupation were excluded.
